# Supplementary material for: Smoking Modifies Pancreatic Cancer Risk Loci on 2q21.3
Source: Oxford University Press journal article supplement (doi:10.1158/0008-5472.can-20-3267), 2021-02-11
Supplement: 00085472can203267-sup-252568_2_supp_6821183_qmfmt2.xlsx [file 00085472can203267-sup-252568_2_supp_6821183_qmfmt2.xlsx]

## Sheet: Sheet 1
Table 7. Enrichment in regulatory regions for rs842357 and related SNPs
Query SNP rs842357 located on Chr2 at 134605269 bp (pos_hg38)										Supplemental Table @:
rsID	r2	ref	alt	EUR	Chromatin_States	Chromatin_States_Imputed	Chromatin_Marks	DNAse	Proteins	grasp	Motifs	Promoter_histone_marks	Enhancer_histone_marks
rs10203582	0.96	C	A	0.58			E006,H3K4me1_Enh;E007,H3K4me1_Enh;E012,H3K4me1_Enh;E019,H3K4me1_Enh;E083,H3K4me1_Enh;E087,H3K4me1_Enh;E104,H3K4me1_Enh;E011,H3K27ac_Enh;E113,H3K4me3_Pro		.	.	Pitx2
rs10803548	0.94	C	A	0.58			E006,H3K4me1_Enh;E007,H3K4me1_Enh;E032,H3K4me1_Enh;E050,H3K4me1_Enh;E051,H3K4me1_Enh;E081,H3K4me1_Enh;E083,H3K4me1_Enh;E087,H3K4me1_Enh;E093,H3K4me1_Enh;E098,H3K4me1_Enh;E116,H3K4me1_Enh;E062,H3K9ac_Pro;E083,H3K9ac_Pro;E108,H3K9ac_Pro		.	.	TEF-1_2
rs1104801	0.91	G	A	0.58	E001,7_Enh;E003,7_Enh;E015,7_Enh;E018,7_Enh;E027,7_Enh;E032,7_Enh;E033,7_Enh;E034,7_Enh;E036,7_Enh;E037,7_Enh;E038,7_Enh;E039,7_Enh;E040,7_Enh;E041,7_Enh;E042,2_TssAFlnk;E043,7_Enh;E044,7_Enh;E045,7_Enh;E046,7_Enh;E047,7_Enh;E048,7_Enh;E050,7_Enh;E051,7_Enh;E063,7_Enh;E081,7_Enh;E082,7_Enh;E083,7_Enh;E087,7_Enh;E090,7_Enh;E092,7_Enh;E093,7_Enh;E095,7_Enh;E096,7_Enh;E097,7_Enh;E098,7_Enh;E105,7_En…	E002,17_EnhW2;E004,17_EnhW2;E005,17_EnhW2;E008,17_EnhW2;E014,17_EnhW2;E018,17_EnhW2;E019,17_EnhW2;E020,17_EnhW2;E022,17_EnhW2;E024,17_EnhW2;E029,17_EnhW2;E030,17_EnhW2;E031,17_EnhW2;E032,15_EnhAF;E033,17_EnhW2;E034,15_EnhAF;E035,17_EnhW2;E036,17_EnhW2;E037,14_EnhA2;E038,17_EnhW2;E039,15_EnhAF;E040,15_EnhAF;E041,14_EnhA2;E042,14_EnhA2;E043,15_EnhAF;E044,15_EnhAF;E045,15_EnhAF;E046,15_EnhAF;E047,15…	E001,H3K4me1_Enh;E003,H3K4me1_Enh;E004,H3K4me1_Enh;E006,H3K4me1_Enh;E007,H3K4me1_Enh;E014,H3K4me1_Enh;E015,H3K4me1_Enh;E018,H3K4me1_Enh;E019,H3K4me1_Enh;E020,H3K4me1_Enh;E022,H3K4me1_Enh;E024,H3K4me1_Enh;E027,H3K4me1_Enh;E031,H3K4me1_Enh;E032,H3K4me1_Enh;E033,H3K4me1_Enh;E034,H3K4me1_Enh;E036,H3K4me1_Enh;E037,H3K4me1_Enh;E038,H3K4me1_Enh;E039,H3K4me1_Enh;E040,H3K4me1_Enh;E041,H3K4me1_Enh;E042,H3K…	E083	.	.	Zfp105	BLD	ESC, IPSC, BRST, BLD, FAT, BRN, HRT, PANC, MUS, GI, THYM, LNG, OVRY, SPLN
rs1104802	0.92	A	C	0.58	E001,7_Enh;E003,7_Enh;E015,7_Enh;E018,7_Enh;E019,7_Enh;E020,7_Enh;E027,7_Enh;E033,7_Enh;E034,7_Enh;E036,7_Enh;E037,7_Enh;E038,7_Enh;E039,7_Enh;E040,7_Enh;E041,7_Enh;E042,7_Enh;E043,7_Enh;E044,7_Enh;E045,7_Enh;E046,7_Enh;E047,7_Enh;E048,7_Enh;E051,7_Enh;E053,7_Enh;E054,7_Enh;E063,7_Enh;E080,7_Enh;E081,7_Enh;E083,7_Enh;E089,7_Enh;E090,7_Enh;E092,7_Enh;E093,7_Enh;E095,7_Enh;E096,7_Enh;E097,7_Enh;E09…	E002,17_EnhW2;E003,17_EnhW2;E004,17_EnhW2;E005,17_EnhW2;E008,17_EnhW2;E014,17_EnhW2;E018,17_EnhW2;E019,17_EnhW2;E020,17_EnhW2;E024,17_EnhW2;E029,17_EnhW2;E030,17_EnhW2;E031,17_EnhW2;E032,17_EnhW2;E033,17_EnhW2;E034,15_EnhAF;E035,17_EnhW2;E037,15_EnhAF;E038,17_EnhW2;E039,17_EnhW2;E040,17_EnhW2;E041,15_EnhAF;E042,15_EnhAF;E043,15_EnhAF;E044,15_EnhAF;E045,17_EnhW2;E046,15_EnhAF;E047,17_EnhW2;E048,17…	E001,H3K4me1_Enh;E003,H3K4me1_Enh;E006,H3K4me1_Enh;E007,H3K4me1_Enh;E014,H3K4me1_Enh;E015,H3K4me1_Enh;E016,H3K4me1_Enh;E018,H3K4me1_Enh;E019,H3K4me1_Enh;E020,H3K4me1_Enh;E022,H3K4me1_Enh;E024,H3K4me1_Enh;E027,H3K4me1_Enh;E031,H3K4me1_Enh;E032,H3K4me1_Enh;E033,H3K4me1_Enh;E034,H3K4me1_Enh;E036,H3K4me1_Enh;E037,H3K4me1_Enh;E038,H3K4me1_Enh;E039,H3K4me1_Enh;E040,H3K4me1_Enh;E041,H3K4me1_Enh;E042,H3K…		.	.	CDP_6;Crx_2;Dbx1;Dbx2;Dmbx1;Gsc;Hoxa7_2;Hoxb4;Hoxb7;Lhx3_1;Lhx3_2;Ncx_2;Nkx6-1_2;Nkx6-1_3;Obox3;Obox6;Otx2;Pax-6_3;Pax7;Pbx-1_1;Pou1f1_1;Pou3f2_4;Pou3f4		ESC, IPSC, BRST, BLD, BRN, FAT, ADRL, HRT, MUS, GI, THYM, LNG, OVRY, PANC, SPLN, VAS
rs11682346	0.94	G	A	0.58	E010,7_Enh;E053,7_Enh;E081,7_Enh;E082,7_Enh	E081,18_EnhAc;E082,19_DNase	E005,H3K4me1_Enh;E007,H3K4me1_Enh;E012,H3K4me1_Enh;E050,H3K4me1_Enh;E065,H3K4me1_Enh;E068,H3K4me1_Enh;E071,H3K4me1_Enh;E081,H3K4me1_Enh;E082,H3K4me1_Enh;E083,H3K4me1_Enh;E098,H3K4me1_Enh;E110,H3K4me1_Enh;E008,H3K4me3_Pro;E113,H3K4me3_Pro;E071,H3K27ac_Enh		.	.	EBF_disc2;ERalpha-a_disc4;Irf_disc4;Klf7;MAZR;PLAG1;Rad21_disc10;VDR_2		ESDR, BRN
rs11684785	0.95	G	A	0.58			E006,H3K4me3_Pro;E006,H3K9ac_Pro;E007,H3K9ac_Pro;E007,H3K4me1_Enh;E068,H3K4me1_Enh;E074,H3K4me1_Enh;E083,H3K4me1_Enh;E087,H3K4me1_Enh;E098,H3K4me1_Enh		.	21886157,Serum ratio of (pyroglutamylglycine)/(trigonelline (N'-methylnicotinate)),7.70E-05	.
rs11898084	0.92	T	C	0.58	E006,7_Enh;E007,7_Enh;E022,7_Enh;E027,7_Enh;E029,7_Enh;E031,7_Enh;E032,7_Enh;E033,2_TssAFlnk;E034,2_TssAFlnk;E035,7_Enh;E036,7_Enh;E037,7_Enh;E038,2_TssAFlnk;E039,2_TssAFlnk;E040,7_Enh;E041,2_TssAFlnk;E042,2_TssAFlnk;E043,7_Enh;E044,2_TssAFlnk;E045,7_Enh;E046,7_Enh;E047,7_Enh;E048,2_TssAFlnk;E050,7_Enh;E051,2_TssAFlnk;E068,7_Enh;E072,7_Enh;E073,7_Enh;E076,7_Enh;E078,7_Enh;E080,7_Enh;E081,7_Enh;E0…	E006,15_EnhAF;E007,17_EnhW2;E029,15_EnhAF;E030,17_EnhW2;E031,15_EnhAF;E032,14_EnhA2;E033,13_EnhA1;E034,13_EnhA1;E035,14_EnhA2;E036,14_EnhA2;E037,13_EnhA1;E038,13_EnhA1;E039,13_EnhA1;E040,13_EnhA1;E041,13_EnhA1;E042,13_EnhA1;E043,13_EnhA1;E044,13_EnhA1;E045,13_EnhA1;E046,13_EnhA1;E047,15_EnhAF;E048,13_EnhA1;E050,14_EnhA2;E051,13_EnhA1;E062,15_EnhAF;E065,17_EnhW2;E066,17_EnhW2;E067,17_EnhW2;E068,16…	E001,H3K4me1_Enh;E003,H3K4me1_Enh;E006,H3K4me1_Enh;E007,H3K4me1_Enh;E012,H3K4me1_Enh;E016,H3K4me1_Enh;E018,H3K4me1_Enh;E021,H3K4me1_Enh;E022,H3K4me1_Enh;E024,H3K4me1_Enh;E027,H3K4me1_Enh;E029,H3K4me1_Enh;E031,H3K4me1_Enh;E032,H3K4me1_Enh;E033,H3K4me1_Enh;E034,H3K4me1_Enh;E035,H3K4me1_Enh;E036,H3K4me1_Enh;E037,H3K4me1_Enh;E038,H3K4me1_Enh;E039,H3K4me1_Enh;E040,H3K4me1_Enh;E041,H3K4me1_Enh;E042,H3K…	E033;E034;E046;E050;E088;E093;E097;E098;E121	.	.	Foxp3	BLD, THYM	ESDR, IPSC, BRST, BLD, BRN, GI, ADRL, HRT, THYM, OVRY, PANC, SPLN, CRVX
rs13432068	0.96	G	A	0.58			E007,H3K9ac_Pro;E098,H3K4me1_Enh;E116,H3K4me1_Enh		.	.	MZF1::1-4_2;Pax-4_4;Pax-4_5
rs1467194	0.92	A	G	0.58	E027,7_Enh;E042,7_Enh;E046,7_Enh;E047,7_Enh;E093,7_Enh;E098,7_Enh	E041,17_EnhW2;E045,17_EnhW2	E005,H3K9ac_Pro;E083,H3K9ac_Pro;E110,H3K9ac_Pro;E018,H3K4me1_Enh;E027,H3K4me1_Enh;E032,H3K4me1_Enh;E034,H3K4me1_Enh;E037,H3K4me1_Enh;E038,H3K4me1_Enh;E039,H3K4me1_Enh;E040,H3K4me1_Enh;E041,H3K4me1_Enh;E042,H3K4me1_Enh;E043,H3K4me1_Enh;E044,H3K4me1_Enh;E045,H3K4me1_Enh;E046,H3K4me1_Enh;E047,H3K4me1_Enh;E048,H3K4me1_Enh;E083,H3K4me1_Enh;E093,H3K4me1_Enh;E094,H3K4me1_Enh;E096,H3K4me1_Enh;E098,H3K4me…		.	21886157,Serum ratio of (pyroglutamylglycine)/(trigonelline (N'-methylnicotinate)),6.00E-05	AP-4_1;Ascl2;E2A_1;E2A_5;GCNF;Lmo2-complex_1;Nr2f2		BRST, BLD, THYM, PANC
rs1516990	0.96	C	G	0.58			E006,H3K9ac_Pro;E011,H3K27ac_Enh;E090,H3K27ac_Enh;E096,H3K27ac_Enh;E011,H3K4me3_Pro;E078,H3K4me3_Pro;E083,H3K4me3_Pro;E096,H3K4me3_Pro;E063,H3K4me1_Enh;E083,H3K4me1_Enh;E090,H3K4me1_Enh;E105,H3K4me1_Enh		.	.	Fox;Pax-4_4;SMC3_disc2
rs1516991	0.96	G	A	0.58			E011,H3K4me3_Pro;E078,H3K4me3_Pro;E083,H3K4me3_Pro;E096,H3K4me3_Pro;E090,H3K27ac_Enh;E096,H3K27ac_Enh		.	.	EWSR1-FLI1;FAC1;Foxo_2;p300_disc5
rs1818613	0.96	G	T	0.58			E083,H3K4me3_Pro;E094,H3K4me1_Enh;E098,H3K4me1_Enh;E110,H3K4me1_Enh;E123,H3K4me1_Enh		HepG2,FOXA1,HudsonAlpha,None	.	BDP1_disc2;Nr2f2;Zbtb12
rs1818614	0.97	A	G	0.58			E083,H3K4me3_Pro;E094,H3K4me1_Enh;E098,H3K4me1_Enh;E110,H3K4me1_Enh;E123,H3K4me1_Enh		.	.	Pax-4_4;TCF12_disc1;ZEB1_disc1;ZEB1_known3
rs201235734	0.94	A	AAC	0.58			E081,H3K4me1_Enh		.	.	FAC1;Foxa_known1;Foxa_known2;Foxa_known3;Foxf1;HDAC2_disc2;Zfp105;p300_disc3;p300_disc5
rs2176341	0.96	A	G	0.58			E011,H3K4me3_Pro;E078,H3K4me3_Pro;E083,H3K4me3_Pro;E087,H3K4me1_Enh		U2OS,SETDB1,UCD,None	.	Foxo_3;Foxp1;GATA_known8;HP1-site-factor;Irf_known8;Irf_known9;Nanog_disc2;SIX5_disc4;Sox_13;Sox_15;TATA_known1;Zfp105
rs2280219	0.99	A	G	0.58	E006,7_Enh;E053,7_Enh;E054,7_Enh;E070,7_Enh;E081,7_Enh;E082,7_Enh;E083,7_Enh	E010,19_DNase;E053,15_EnhAF;E054,17_EnhW2;E070,17_EnhW2;E081,14_EnhA2;E082,16_EnhW1;E083,22_PromP	E001,H3K4me1_Enh;E002,H3K4me1_Enh;E003,H3K4me1_Enh;E008,H3K4me1_Enh;E010,H3K4me1_Enh;E014,H3K4me1_Enh;E018,H3K4me1_Enh;E020,H3K4me1_Enh;E021,H3K4me1_Enh;E024,H3K4me1_Enh;E053,H3K4me1_Enh;E054,H3K4me1_Enh;E063,H3K4me1_Enh;E070,H3K4me1_Enh;E081,H3K4me1_Enh;E082,H3K4me1_Enh;E083,H3K4me1_Enh;E087,H3K4me1_Enh;E098,H3K4me1_Enh;E011,H3K27ac_Enh;E012,H3K27ac_Enh;E020,H3K27ac_Enh;E087,H3K27ac_Enh;E019,H3K…	E081;E082	.	.	Irf_disc3;Irf_known9;Nanog_disc2;Pax-5_disc3;RXRA_disc4		ESDR, BRN, HRT
rs35599954	0.94	T	C	0.58	E069,7_Enh		E007,H3K4me1_Enh;E067,H3K4me1_Enh;E068,H3K4me1_Enh;E069,H3K4me1_Enh;E071,H3K4me1_Enh;E074,H3K4me1_Enh;E083,H3K4me1_Enh;E087,H3K4me1_Enh;E078,H3K4me3_Pro		.	.	RFX5_disc1;RFX5_known4		BRN
rs4954154	0.96	G	A	0.58			E011,H3K4me3_Pro;E078,H3K4me3_Pro;E083,H3K4me3_Pro		.	.	Evi-1_3;GATA_known9;Hoxb13
rs4954155	0.95	T	C	0.58			E007,H3K27ac_Enh;E081,H3K4me1_Enh;E098,H3K4me1_Enh		.	.	Irf_known7
rs4954156	0.94	T	C	0.58	E083,7_Enh		E062,H3K9ac_Pro;E083,H3K9ac_Pro;E083,H3K4me1_Enh;E087,H3K4me1_Enh		.	.	CEBPA_1;CEBPB_known6;THAP1_disc1;YY1_disc2		HRT
rs4954158	0.92	T	C	0.58	E006,7_Enh;E027,7_Enh;E032,7_Enh;E033,2_TssAFlnk;E034,7_Enh;E036,7_Enh;E037,7_Enh;E038,7_Enh;E039,2_TssAFlnk;E040,7_Enh;E041,7_Enh;E042,7_Enh;E043,2_TssAFlnk;E044,7_Enh;E045,2_TssAFlnk;E046,7_Enh;E047,7_Enh;E048,2_TssAFlnk;E050,7_Enh;E051,7_Enh;E062,7_Enh;E083,7_Enh;E093,7_Enh;E098,7_Enh;E112,7_Enh;E113,7_Enh;E115,2_TssAFlnk	E006,17_EnhW2;E029,17_EnhW2;E030,17_EnhW2;E031,17_EnhW2;E032,14_EnhA2;E033,14_EnhA2;E034,13_EnhA1;E035,17_EnhW2;E036,17_EnhW2;E037,14_EnhA2;E038,14_EnhA2;E039,14_EnhA2;E040,14_EnhA2;E041,13_EnhA1;E042,13_EnhA1;E043,14_EnhA2;E044,13_EnhA1;E045,13_EnhA1;E046,14_EnhA2;E047,14_EnhA2;E048,14_EnhA2;E050,15_EnhAF;E051,14_EnhA2;E062,15_EnhAF;E063,19_DNase;E066,19_DNase;E079,18_EnhAc;E086,19_DNase;E093,14…	E001,H3K4me1_Enh;E006,H3K4me1_Enh;E027,H3K4me1_Enh;E032,H3K4me1_Enh;E033,H3K4me1_Enh;E034,H3K4me1_Enh;E035,H3K4me1_Enh;E036,H3K4me1_Enh;E037,H3K4me1_Enh;E038,H3K4me1_Enh;E039,H3K4me1_Enh;E040,H3K4me1_Enh;E041,H3K4me1_Enh;E042,H3K4me1_Enh;E043,H3K4me1_Enh;E044,H3K4me1_Enh;E045,H3K4me1_Enh;E046,H3K4me1_Enh;E047,H3K4me1_Enh;E048,H3K4me1_Enh;E050,H3K4me1_Enh;E051,H3K4me1_Enh;E062,H3K4me1_Enh;E068,H3K…	E033;E034;E046;E050;E051;E088;E093;E098;E109;E125;E128	GM12878,BATF,HudsonAlpha,None;GM12878,BCL11A,HudsonAlpha,None;GM12878,IRF4,HudsonAlpha,None;GM12878,TCF12,HudsonAlpha,None	.	Maf_known1;Zbtb3	BLD	ESDR, BRST, BLD, HRT, THYM, PANC, SPLN
rs4954159	0.92	A	G	0.58	E006,7_Enh;E027,7_Enh;E032,7_Enh;E033,2_TssAFlnk;E034,7_Enh;E036,7_Enh;E037,7_Enh;E038,7_Enh;E039,2_TssAFlnk;E040,7_Enh;E041,7_Enh;E042,7_Enh;E043,2_TssAFlnk;E044,7_Enh;E045,2_TssAFlnk;E046,7_Enh;E047,7_Enh;E048,2_TssAFlnk;E050,7_Enh;E051,7_Enh;E062,7_Enh;E083,7_Enh;E093,7_Enh;E098,7_Enh;E112,7_Enh;E113,7_Enh;E115,2_TssAFlnk	E006,17_EnhW2;E029,17_EnhW2;E030,17_EnhW2;E031,17_EnhW2;E032,14_EnhA2;E033,14_EnhA2;E034,13_EnhA1;E035,17_EnhW2;E036,17_EnhW2;E037,14_EnhA2;E038,14_EnhA2;E039,14_EnhA2;E040,14_EnhA2;E041,13_EnhA1;E042,13_EnhA1;E043,14_EnhA2;E044,13_EnhA1;E045,13_EnhA1;E046,14_EnhA2;E047,14_EnhA2;E048,14_EnhA2;E050,15_EnhAF;E051,14_EnhA2;E062,15_EnhAF;E063,19_DNase;E066,19_DNase;E079,18_EnhAc;E086,19_DNase;E093,14…	E001,H3K4me1_Enh;E006,H3K4me1_Enh;E012,H3K4me1_Enh;E027,H3K4me1_Enh;E032,H3K4me1_Enh;E033,H3K4me1_Enh;E034,H3K4me1_Enh;E035,H3K4me1_Enh;E036,H3K4me1_Enh;E037,H3K4me1_Enh;E038,H3K4me1_Enh;E039,H3K4me1_Enh;E040,H3K4me1_Enh;E041,H3K4me1_Enh;E042,H3K4me1_Enh;E043,H3K4me1_Enh;E044,H3K4me1_Enh;E045,H3K4me1_Enh;E046,H3K4me1_Enh;E047,H3K4me1_Enh;E048,H3K4me1_Enh;E050,H3K4me1_Enh;E051,H3K4me1_Enh;E062,H3K…	E033;E034;E046;E050;E088;E093	.	.	Egr-1_known4;SIX5_known2	BLD	ESDR, BRST, BLD, HRT, THYM, PANC, SPLN
rs6430528	0.94	A	G	0.58			E028,H3K4me3_Pro;E083,H3K4me1_Enh;E087,H3K4me1_Enh;E083,H3K9ac_Pro		.	.	Nkx3_3
rs6430529	0.91	G	T	0.58	E036,7_Enh;E083,7_Enh;E087,7_Enh;E110,7_Enh	E083,18_EnhAc;E110,22_PromP	E012,H3K27ac_Enh;E063,H3K27ac_Enh;E098,H3K27ac_Enh;E019,H3K4me1_Enh;E036,H3K4me1_Enh;E037,H3K4me1_Enh;E040,H3K4me1_Enh;E041,H3K4me1_Enh;E042,H3K4me1_Enh;E043,H3K4me1_Enh;E045,H3K4me1_Enh;E046,H3K4me1_Enh;E050,H3K4me1_Enh;E051,H3K4me1_Enh;E063,H3K4me1_Enh;E081,H3K4me1_Enh;E083,H3K4me1_Enh;E087,H3K4me1_Enh;E110,H3K4me1_Enh;E041,H3K4me3_Pro;E083,H3K4me3_Pro;E110,H3K4me3_Pro;E083,H3K9ac_Pro;E110,H3K9…	E098	.	.	BCL_disc2;CHX10;Crx_1;HNF1_1;Hoxa7_2;Hoxb4;Msx-1_2;Pou2f2_known3;Prrx1;RXRA_disc3		BLD, HRT, PANC, GI
rs6713239	0.91	C	T	0.58	E003,7_Enh;E014,7_Enh;E019,7_Enh;E032,7_Enh;E033,2_TssAFlnk;E034,7_Enh;E036,7_Enh;E037,7_Enh;E038,7_Enh;E039,2_TssAFlnk;E040,7_Enh;E041,2_TssAFlnk;E042,2_TssAFlnk;E043,7_Enh;E044,7_Enh;E045,7_Enh;E046,7_Enh;E047,7_Enh;E048,7_Enh;E051,7_Enh;E080,7_Enh;E083,7_Enh;E093,7_Enh;E098,7_Enh;E104,7_Enh;E105,7_Enh;E116,7_Enh	E001,17_EnhW2;E011,17_EnhW2;E012,17_EnhW2;E020,17_EnhW2;E022,17_EnhW2;E029,17_EnhW2;E030,17_EnhW2;E031,17_EnhW2;E032,15_EnhAF;E033,17_EnhW2;E034,14_EnhA2;E035,17_EnhW2;E036,17_EnhW2;E037,14_EnhA2;E038,14_EnhA2;E039,14_EnhA2;E040,14_EnhA2;E041,13_EnhA1;E042,13_EnhA1;E043,14_EnhA2;E044,14_EnhA2;E045,14_EnhA2;E046,15_EnhAF;E047,14_EnhA2;E048,14_EnhA2;E050,17_EnhW2;E051,17_EnhW2;E062,17_EnhW2;E063,17…	E001,H3K4me1_Enh;E003,H3K4me1_Enh;E006,H3K4me1_Enh;E007,H3K4me1_Enh;E012,H3K4me1_Enh;E014,H3K4me1_Enh;E015,H3K4me1_Enh;E016,H3K4me1_Enh;E018,H3K4me1_Enh;E019,H3K4me1_Enh;E020,H3K4me1_Enh;E022,H3K4me1_Enh;E024,H3K4me1_Enh;E027,H3K4me1_Enh;E031,H3K4me1_Enh;E032,H3K4me1_Enh;E033,H3K4me1_Enh;E034,H3K4me1_Enh;E036,H3K4me1_Enh;E037,H3K4me1_Enh;E038,H3K4me1_Enh;E039,H3K4me1_Enh;E040,H3K4me1_Enh;E041,H3K…	E083;E093	GM12891,PU1,HudsonAlpha,None	.	KAP1_disc2	BLD	ESC, IPSC, BLD, ADRL, HRT, THYM, PANC
rs6729090	0.94	G	A	0.58			E087,H3K4me1_Enh		.	.	DMRT1;Foxj2_2;GR_known10;Homez;Pou2f2_known8
rs6750788	0.96	A	G	0.58			E006,H3K4me1_Enh;E007,H3K4me1_Enh;E012,H3K4me1_Enh;E019,H3K4me1_Enh;E083,H3K4me1_Enh;E087,H3K4me1_Enh;E104,H3K4me1_Enh;E011,H3K27ac_Enh;E113,H3K4me3_Pro		.	.	Arid5a;Elf3;Elf5;HNF1_4;Nkx3_4;STAT_known3
rs6758396	0.93	T	C	0.58	E083,7_Enh		E007,H3K27ac_Enh;E008,H3K27ac_Enh;E007,H3K4me1_Enh;E034,H3K4me1_Enh;E037,H3K4me1_Enh;E038,H3K4me1_Enh;E039,H3K4me1_Enh;E041,H3K4me1_Enh;E042,H3K4me1_Enh;E043,H3K4me1_Enh;E044,H3K4me1_Enh;E046,H3K4me1_Enh;E047,H3K4me1_Enh;E083,H3K4me1_Enh;E093,H3K4me1_Enh;E098,H3K4me1_Enh;E083,H3K9ac_Pro		.	.	Zbtb3		HRT
rs6759065	0.94	A	G	0.58	E035,7_Enh		E005,H3K4me1_Enh;E007,H3K4me1_Enh;E051,H3K4me1_Enh;E065,H3K4me1_Enh;E068,H3K4me1_Enh;E081,H3K4me1_Enh;E083,H3K4me1_Enh;E021,H3K27ac_Enh;E047,H3K9ac_Pro		.	.	CHOP::CEBPalpha;YY1_known5		BLD
rs74600663	0.96	C	G	0.58					.	.	BAF155_disc2;DMRT5;Znf143_disc2
rs7558554	0.95	G	C	0.58			E083,H3K4me3_Pro;E098,H3K4me1_Enh;E110,H3K4me1_Enh		.	21886157,Serum ratio of (pyroglutamylglycine)/(trigonelline (N'-methylnicotinate)),2.10E-04	AP-4_2;ERalpha-a_known4;GR_known6;HEN1_2;Nanog_disc3
rs7570717	0.96	G	A	0.58	E006,7_Enh;E007,7_Enh;E087,7_Enh		E007,H3K4me1_Enh;E010,H3K4me1_Enh;E012,H3K4me1_Enh;E054,H3K4me1_Enh;E082,H3K4me1_Enh;E083,H3K4me1_Enh;E087,H3K4me1_Enh;E098,H3K4me1_Enh;E104,H3K4me1_Enh;E105,H3K4me1_Enh;E011,H3K27ac_Enh		.	21886157,Serum ratio of (pyroglutamylglycine)/(trigonelline (N'-methylnicotinate)),4.20E-05	.		ESDR, PANC
rs7571113	0.92	A	G	0.58	E006,7_Enh;E027,7_Enh;E032,7_Enh;E033,2_TssAFlnk;E034,7_Enh;E036,7_Enh;E037,7_Enh;E038,2_TssAFlnk;E039,2_TssAFlnk;E040,7_Enh;E041,7_Enh;E042,2_TssAFlnk;E043,7_Enh;E044,7_Enh;E045,2_TssAFlnk;E046,7_Enh;E047,7_Enh;E048,2_TssAFlnk;E050,7_Enh;E051,7_Enh;E062,7_Enh;E079,7_Enh;E080,7_Enh;E083,7_Enh;E088,7_Enh;E093,7_Enh;E094,7_Enh;E096,7_Enh;E098,7_Enh;E110,7_Enh;E112,7_Enh;E113,7_Enh;E115,2_TssAFlnk	E005,17_EnhW2;E006,15_EnhAF;E029,17_EnhW2;E030,17_EnhW2;E031,15_EnhAF;E032,15_EnhAF;E033,14_EnhA2;E034,13_EnhA1;E035,15_EnhAF;E036,15_EnhAF;E037,13_EnhA1;E038,13_EnhA1;E039,13_EnhA1;E040,13_EnhA1;E041,13_EnhA1;E042,13_EnhA1;E043,14_EnhA2;E044,13_EnhA1;E045,13_EnhA1;E046,14_EnhA2;E047,14_EnhA2;E048,13_EnhA1;E050,15_EnhAF;E051,15_EnhAF;E062,14_EnhA2;E066,17_EnhW2;E075,17_EnhW2;E079,15_EnhAF;E080,18…	E001,H3K4me1_Enh;E006,H3K4me1_Enh;E012,H3K4me1_Enh;E022,H3K4me1_Enh;E027,H3K4me1_Enh;E031,H3K4me1_Enh;E032,H3K4me1_Enh;E033,H3K4me1_Enh;E034,H3K4me1_Enh;E035,H3K4me1_Enh;E036,H3K4me1_Enh;E037,H3K4me1_Enh;E038,H3K4me1_Enh;E039,H3K4me1_Enh;E040,H3K4me1_Enh;E041,H3K4me1_Enh;E042,H3K4me1_Enh;E043,H3K4me1_Enh;E044,H3K4me1_Enh;E045,H3K4me1_Enh;E046,H3K4me1_Enh;E047,H3K4me1_Enh;E048,H3K4me1_Enh;E050,H3K…		.	.	BDP1_disc1;SP1_known3;Spz1_1	BLD	ESDR, BRST, BLD, GI, ADRL, HRT, LNG, THYM, PANC, SPLN
rs7575742	0.92	A	G	0.58	E001,7_Enh;E003,7_Enh;E006,7_Enh;E007,7_Enh;E008,7_Enh;E012,7_Enh;E015,7_Enh;E018,7_Enh;E019,7_Enh;E020,7_Enh;E022,7_Enh;E024,7_Enh;E031,7_Enh;E032,7_Enh;E033,7_Enh;E034,7_Enh;E035,7_Enh;E036,7_Enh;E037,2_TssAFlnk;E038,2_TssAFlnk;E039,7_Enh;E040,7_Enh;E041,2_TssAFlnk;E042,2_TssAFlnk;E043,2_TssAFlnk;E044,7_Enh;E045,7_Enh;E046,7_Enh;E047,7_Enh;E048,7_Enh;E050,7_Enh;E051,7_Enh;E054,7_Enh;E079,7_Enh;…	E001,17_EnhW2;E002,17_EnhW2;E003,17_EnhW2;E005,17_EnhW2;E006,15_EnhAF;E007,17_EnhW2;E008,17_EnhW2;E009,17_EnhW2;E011,17_EnhW2;E012,17_EnhW2;E013,17_EnhW2;E014,17_EnhW2;E016,17_EnhW2;E018,17_EnhW2;E019,17_EnhW2;E020,16_EnhW1;E021,17_EnhW2;E022,17_EnhW2;E024,17_EnhW2;E029,17_EnhW2;E030,17_EnhW2;E031,15_EnhAF;E032,14_EnhA2;E033,15_EnhAF;E034,13_EnhA1;E035,17_EnhW2;E036,15_EnhAF;E037,13_EnhA1;E038,13…	E001,H3K4me1_Enh;E003,H3K4me1_Enh;E005,H3K4me1_Enh;E006,H3K4me1_Enh;E007,H3K4me1_Enh;E008,H3K4me1_Enh;E012,H3K4me1_Enh;E014,H3K4me1_Enh;E015,H3K4me1_Enh;E016,H3K4me1_Enh;E018,H3K4me1_Enh;E019,H3K4me1_Enh;E020,H3K4me1_Enh;E021,H3K4me1_Enh;E022,H3K4me1_Enh;E024,H3K4me1_Enh;E027,H3K4me1_Enh;E029,H3K4me1_Enh;E031,H3K4me1_Enh;E032,H3K4me1_Enh;E033,H3K4me1_Enh;E034,H3K4me1_Enh;E035,H3K4me1_Enh;E036,H3K…		.	.	BDP1_disc3;GR_disc6;Smad3_2;Smad_2	BLD	ESC, ESDR, IPSC, BLD, BRN, GI, HRT, MUS, THYM, LNG, OVRY, PANC, SPLN, CRVX
rs7584925	0.98	A	G	0.58					.	.	CACD_1;HMG-IY_2;Hmx_1;Rad21_disc3
rs7588102	0.82	T	C	0.54					.	.	Bbx;Dbx1;Foxm1;Gsc;Hbp1;Lhx3_2;Obox3;Obox6;Pou1f1_2;Pou2f2_known2;Pou3f2_1;Pou3f4;Sox_18;Sox_3;YY1_known3
rs7602801	0.94	A	G	0.58			E007,H3K4me1_Enh;E012,H3K4me1_Enh;E020,H3K4me1_Enh;E024,H3K4me1_Enh;E083,H3K4me1_Enh;E104,H3K4me1_Enh;E105,H3K4me1_Enh;E011,H3K27ac_Enh;E105,H3K27ac_Enh;E113,H3K4me3_Pro		.	.	CHOP::CEBPalpha;YY1_known4
rs842348	0.89	T	G	0.41	E027,7_Enh;E083,7_Enh;E097,7_Enh;E098,7_Enh		E027,H3K4me1_Enh;E032,H3K4me1_Enh;E034,H3K4me1_Enh;E044,H3K4me1_Enh;E046,H3K4me1_Enh;E051,H3K4me1_Enh;E053,H3K4me1_Enh;E063,H3K4me1_Enh;E082,H3K4me1_Enh;E083,H3K4me1_Enh;E097,H3K4me1_Enh;E098,H3K4me1_Enh;E027,H3K9ac_Pro;E124,H3K9ac_Pro		.	.	Foxa_disc3		BRST, HRT, OVRY, PANC
rs842349	0.81	G	T	0.43	E027,7_Enh;E083,7_Enh;E097,7_Enh;E098,7_Enh		E027,H3K4me1_Enh;E032,H3K4me1_Enh;E034,H3K4me1_Enh;E044,H3K4me1_Enh;E046,H3K4me1_Enh;E051,H3K4me1_Enh;E053,H3K4me1_Enh;E063,H3K4me1_Enh;E082,H3K4me1_Enh;E083,H3K4me1_Enh;E097,H3K4me1_Enh;E098,H3K4me1_Enh;E027,H3K9ac_Pro;E124,H3K9ac_Pro		.	.	AP-1_disc8;Barx1;Barx2;Bsx;Dlx3;Dlx5;En-1_1;En-1_2;FXR_1;HMG-IY_2;Lhx4;p53_2		BRST, HRT, OVRY, PANC
rs842351	0.88	A	G	0.44			E044,H3K4me1_Enh;E046,H3K4me1_Enh;E083,H3K4me1_Enh		.	.	ATF3_disc3;CACD_2;YY1_disc4
rs842355	0.92	G	C	0.44	E034,7_Enh;E046,7_Enh;E051,7_Enh;E083,7_Enh		E005,H3K4me1_Enh;E006,H3K4me1_Enh;E032,H3K4me1_Enh;E034,H3K4me1_Enh;E036,H3K4me1_Enh;E046,H3K4me1_Enh;E047,H3K4me1_Enh;E050,H3K4me1_Enh;E051,H3K4me1_Enh;E083,H3K4me1_Enh;E094,H3K4me1_Enh;E096,H3K4me1_Enh;E110,H3K4me1_Enh;E115,H3K4me1_Enh;E083,H3K4me3_Pro;E096,H3K27ac_Enh;E115,H3K27ac_Enh		.	.	AP-1_disc7;Smad_1;p300_known1		BLD, HRT
rs842357	1	G	A	0.42	E006,7_Enh;E051,7_Enh;E118,12_EnhBiv		E005,H3K4me1_Enh;E006,H3K4me1_Enh;E032,H3K4me1_Enh;E034,H3K4me1_Enh;E036,H3K4me1_Enh;E046,H3K4me1_Enh;E050,H3K4me1_Enh;E051,H3K4me1_Enh;E083,H3K4me1_Enh;E094,H3K4me1_Enh;E096,H3K4me1_Enh;E110,H3K4me1_Enh;E115,H3K4me1_Enh;E118,H3K4me1_Enh;E083,H3K4me3_Pro;E096,H3K27ac_Enh;E115,H3K27ac_Enh		.	.	CTCF_disc9;Nanog_disc3		ESDR, BLD, LIV
rs842358	0.92	G	A	0.44	E006,7_Enh;E051,7_Enh;E118,12_EnhBiv		E005,H3K4me1_Enh;E006,H3K4me1_Enh;E034,H3K4me1_Enh;E036,H3K4me1_Enh;E046,H3K4me1_Enh;E050,H3K4me1_Enh;E051,H3K4me1_Enh;E053,H3K4me1_Enh;E083,H3K4me1_Enh;E094,H3K4me1_Enh;E096,H3K4me1_Enh;E110,H3K4me1_Enh;E115,H3K4me1_Enh;E118,H3K4me1_Enh;E083,H3K4me3_Pro;E096,H3K27ac_Enh;E115,H3K27ac_Enh		.	21886157,Serum ratio of (pyroglutamylglycine)/(trigonelline (N'-methylnicotinate)),2.00E-05	ERalpha-a_known1;HIF1;HIF1::Arnt;Nanog_disc2;PPAR_1;PPAR_3;RORalpha1_1;RXRA_known1		ESDR, BLD, LIV
rs842360	0.9	T	C	0.44			E001,H3K4me3_Pro;E014,H3K4me3_Pro;E016,H3K4me3_Pro;E020,H3K4me3_Pro;E083,H3K4me3_Pro;E102,H3K4me3_Pro;E003,H3K27ac_Enh;E011,H3K27ac_Enh;E020,H3K27ac_Enh;E082,H3K4me1_Enh;E083,H3K4me1_Enh;E098,H3K4me1_Enh		.	.	p53_3
rs842361	0.8	C	G	0.43	E034,7_Enh;E046,7_Enh;E116,7_Enh	E032,17_EnhW2;E046,18_EnhAc	E006,H3K4me1_Enh;E027,H3K4me1_Enh;E032,H3K4me1_Enh;E034,H3K4me1_Enh;E041,H3K4me1_Enh;E044,H3K4me1_Enh;E046,H3K4me1_Enh;E047,H3K4me1_Enh;E048,H3K4me1_Enh;E050,H3K4me1_Enh;E081,H3K4me1_Enh;E082,H3K4me1_Enh;E083,H3K4me1_Enh;E093,H3K4me1_Enh;E094,H3K4me1_Enh;E097,H3K4me1_Enh;E098,H3K4me1_Enh;E113,H3K4me1_Enh;E115,H3K4me1_Enh;E116,H3K4me1_Enh;E121,H3K4me1_Enh;E006,H3K9ac_Pro;E075,H3K9ac_Pro;E080,H3K27…		.	20502693,Gene expression of THRA in peripheral blood monocytes,9.47E-06;21886157,Serum ratio of (pyroglutamylglycine)/(trigonelline (N'-methylnicotinate)),2.50E-05	Ets_disc1;Hoxa5_1;Rad21_disc4		BLD
rs842362	0.89	G	A	0.41	E027,7_Enh;E032,7_Enh;E034,7_Enh;E046,7_Enh;E098,7_Enh;E116,7_Enh	E032,17_EnhW2;E046,18_EnhAc	E006,H3K4me1_Enh;E027,H3K4me1_Enh;E032,H3K4me1_Enh;E034,H3K4me1_Enh;E044,H3K4me1_Enh;E046,H3K4me1_Enh;E047,H3K4me1_Enh;E048,H3K4me1_Enh;E050,H3K4me1_Enh;E081,H3K4me1_Enh;E082,H3K4me1_Enh;E083,H3K4me1_Enh;E093,H3K4me1_Enh;E094,H3K4me1_Enh;E097,H3K4me1_Enh;E098,H3K4me1_Enh;E113,H3K4me1_Enh;E115,H3K4me1_Enh;E116,H3K4me1_Enh;E121,H3K4me1_Enh;E027,H3K9ac_Pro;E075,H3K9ac_Pro;E080,H3K27ac_Enh;E106,H3K27…	E046	GM12891,YY1,HudsonAlpha,None	21886157,Serum concentration of 3-(4-hydroxyphenyl)lactate,6.20E-04;21886157,Serum ratio of (pyroglutamylglycine)/(trigonelline (N'-methylnicotinate)),1.20E-04	CDP_6;RXRA_known5;TCF4_known1		BRST, BLD, PANC
rs859766	0.89	C	T	0.41	E027,7_Enh;E083,7_Enh;E097,7_Enh;E098,7_Enh		E027,H3K4me1_Enh;E032,H3K4me1_Enh;E034,H3K4me1_Enh;E044,H3K4me1_Enh;E046,H3K4me1_Enh;E051,H3K4me1_Enh;E053,H3K4me1_Enh;E063,H3K4me1_Enh;E082,H3K4me1_Enh;E083,H3K4me1_Enh;E094,H3K4me1_Enh;E097,H3K4me1_Enh;E098,H3K4me1_Enh;E027,H3K9ac_Pro;E124,H3K9ac_Pro		.	.	.		BRST, BLD, PANC
rs859767	0.8	A	G	0.43	E027,7_Enh;E032,7_Enh;E034,7_Enh;E046,7_Enh;E098,7_Enh;E116,7_Enh	E032,17_EnhW2;E046,18_EnhAc	E006,H3K4me1_Enh;E022,H3K4me1_Enh;E027,H3K4me1_Enh;E032,H3K4me1_Enh;E034,H3K4me1_Enh;E044,H3K4me1_Enh;E046,H3K4me1_Enh;E047,H3K4me1_Enh;E048,H3K4me1_Enh;E050,H3K4me1_Enh;E053,H3K4me1_Enh;E063,H3K4me1_Enh;E081,H3K4me1_Enh;E082,H3K4me1_Enh;E083,H3K4me1_Enh;E093,H3K4me1_Enh;E094,H3K4me1_Enh;E097,H3K4me1_Enh;E098,H3K4me1_Enh;E113,H3K4me1_Enh;E115,H3K4me1_Enh;E116,H3K4me1_Enh;E121,H3K4me1_Enh;E027,H3K…	E046;E109	GM12891,YY1,HudsonAlpha,None	.	PEBP;STAT_known15
rs883964	0.91	G	C	0.58	E001,7_Enh;E003,7_Enh;E006,7_Enh;E014,7_Enh;E015,7_Enh;E016,7_Enh;E019,7_Enh;E020,7_Enh;E022,7_Enh;E027,7_Enh;E033,7_Enh;E034,7_Enh;E036,7_Enh;E037,7_Enh;E038,7_Enh;E039,7_Enh;E040,7_Enh;E041,7_Enh;E042,7_Enh;E043,7_Enh;E044,7_Enh;E045,7_Enh;E046,7_Enh;E047,7_Enh;E048,7_Enh;E051,7_Enh;E053,7_Enh;E054,7_Enh;E063,7_Enh;E080,7_Enh;E081,7_Enh;E083,2_TssAFlnk;E089,7_Enh;E090,7_Enh;E092,7_Enh;E093,7_En…	E001,17_EnhW2;E002,17_EnhW2;E003,17_EnhW2;E004,17_EnhW2;E005,17_EnhW2;E008,17_EnhW2;E010,17_EnhW2;E012,17_EnhW2;E014,17_EnhW2;E015,17_EnhW2;E016,17_EnhW2;E018,16_EnhW1;E019,17_EnhW2;E020,17_EnhW2;E021,17_EnhW2;E022,17_EnhW2;E024,17_EnhW2;E029,17_EnhW2;E030,17_EnhW2;E031,17_EnhW2;E032,17_EnhW2;E033,17_EnhW2;E034,15_EnhAF;E035,17_EnhW2;E037,15_EnhAF;E038,17_EnhW2;E039,17_EnhW2;E040,17_EnhW2;E041,15…	E001,H3K4me1_Enh;E003,H3K4me1_Enh;E006,H3K4me1_Enh;E007,H3K4me1_Enh;E014,H3K4me1_Enh;E015,H3K4me1_Enh;E016,H3K4me1_Enh;E018,H3K4me1_Enh;E019,H3K4me1_Enh;E020,H3K4me1_Enh;E022,H3K4me1_Enh;E024,H3K4me1_Enh;E027,H3K4me1_Enh;E031,H3K4me1_Enh;E032,H3K4me1_Enh;E033,H3K4me1_Enh;E034,H3K4me1_Enh;E036,H3K4me1_Enh;E037,H3K4me1_Enh;E038,H3K4me1_Enh;E039,H3K4me1_Enh;E040,H3K4me1_Enh;E041,H3K4me1_Enh;E042,H3K…	E080;E083;E098	.	.	HEY1_disc2;LRH1;Pbx3_disc3	HRT	ESC, ESDR, IPSC, BRST, BLD, BRN, FAT, ADRL, MUS, GI, THYM, HRT, LNG, OVRY, PANC, SPLN, VAS
rs9287436	0.9	T	A	0.56					.	.	Foxi1;Foxj2_1;Foxp1;Mef2_known1;Mef2_known5;Mef2_known6;TATA_known4
rs9287437	0.97	C	T	0.58			E006,H3K9ac_Pro;E083,H3K4me3_Pro;E110,H3K4me1_Enh		.	.	Cdx;Pax-4_5;RREB-1_1;RREB-1_2
*NOTE This table has been created using the R package haploR and function queryHaploreg specifing rs842357 SNP
